# Supplementary material for: Antioxidative 2D Bismuth Selenide via Halide Passivation for Enhanced Device Stability
Source: MDPI journal article supplement (doi:10.3390/nano13142056), 2023-07-12
Supplement: s1 [file s1]

# Antioxidative 2D Bismuth Selenide via Halide Passivation for Enhanced Device Stability

Jiayi Chen <sup>1,2,†</sup>, Guodong Wu <sup>1,2,†</sup>, Yamei Ding <sup>1,2</sup>, Qichao Chen <sup>1,2</sup>, Wenya Gao <sup>1,2</sup>, Tuo Zhang <sup>1,2</sup>, Xu Jing <sup>1,2</sup>, Huiwen Lin <sup>1,2</sup>, Feng Xue <sup>1,2</sup> and Li Tao <sup>1,2,\*</sup>

<sup>1</sup> School of Materials Science and Engineering, Southeast University, Nanjing 211189, China; jiayi\_chen@seu.edu.cn (J.C.); wuguodongjohn@gmail.com (G.W.);

<sup>2</sup> Jiangsu Key Laboratory for Advanced Metallic Materials, Southeast University, Nanjing 211189, China

\* Corresponding: tao@seu.edu.cn

† These authors contributed equally to this work.

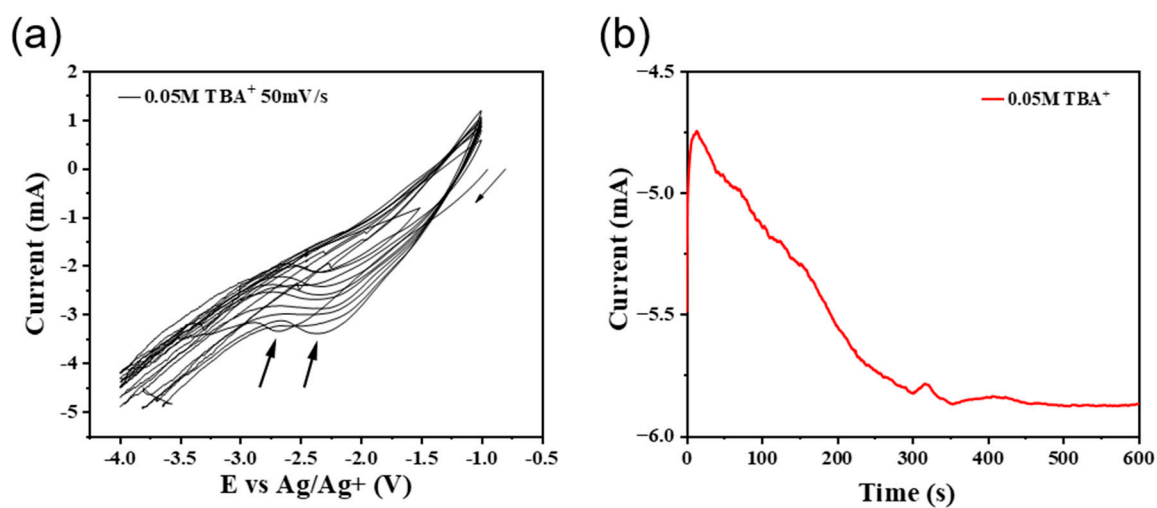

**Figure S1.** (a) Linear sweep voltammetry of the electrochemical intercalation of TBA<sup>+</sup> and (b) the profile of the current change with time at the potential of -2.5 V in the solution containing TBA<sup>+</sup>.

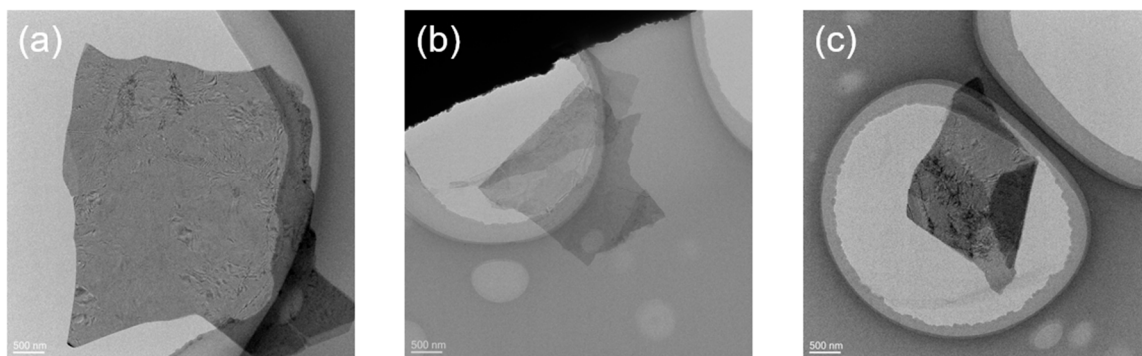

**Figure S2.** Transmission electron microscopy images of the TBAC- $\text{Bi}_2\text{Se}_3$ , TBAB- $\text{Bi}_2\text{Se}_3$ , and TBAI- $\text{Bi}_2\text{Se}_3$  nanosheets are shown as (a), (b) and (c), respectively.

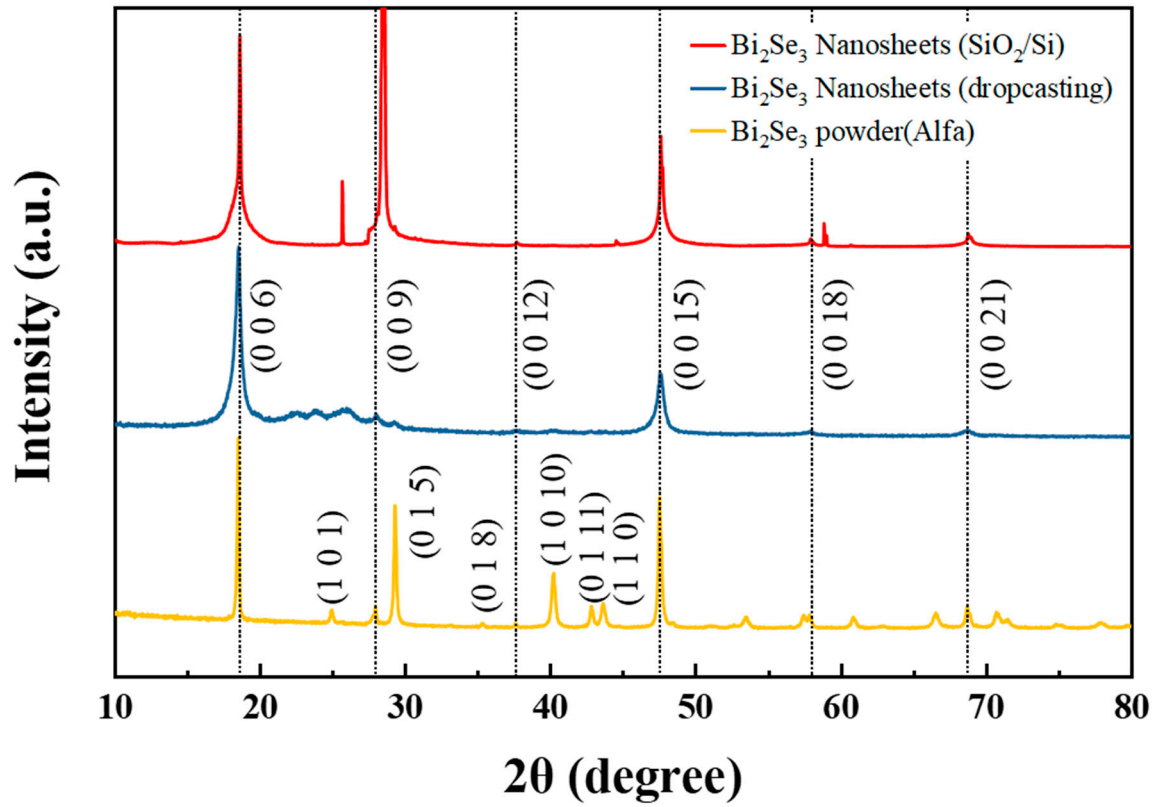

**Figure S3:** XRD pattern of the Bi<sub>2</sub>Se<sub>3</sub> powder and PDF#JCPDS:033-0214. The peaks corresponding to the crystal facets were assigned and shown in a dotted line. Nanosheet film was fabricated by spin-coating, while the blue line corresponds to drop casting.

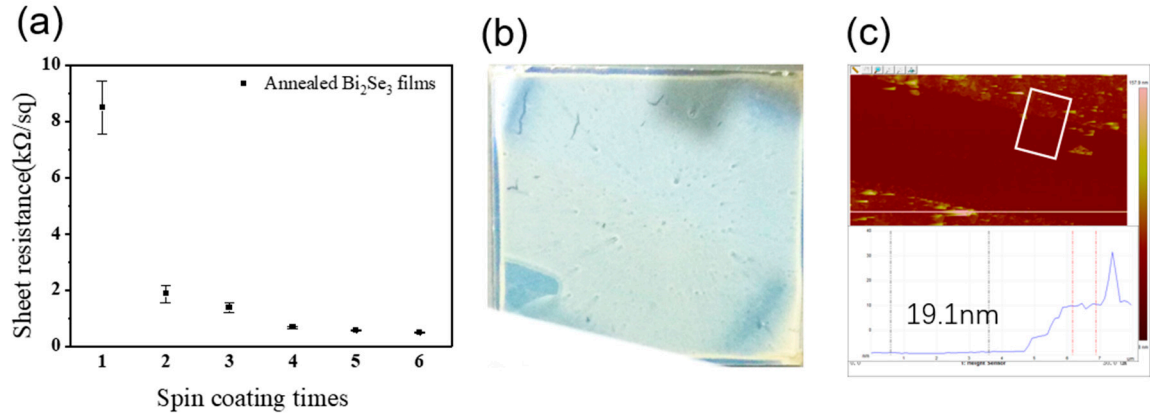

**Figure S4:** (a) Sheet resistance of annealed Bi<sub>2</sub>Se<sub>3</sub> thin films obtained by different spin-coating times, (b) optical image of spin-coated films on a wafer, and (c) atomic force microscope image of the film with an artificial step. More than 4 times of spin-coating will form a thin Bi<sub>2</sub>Se<sub>3</sub> film with a sheet resistance of 1 kΩ/sq.
